# Supplementary material
Source: PubMed Central journal article supplement (PMC524302)
Supplement: nar_32_18_5539__1.pdf [file nar_32_18_5539__1.pdf]

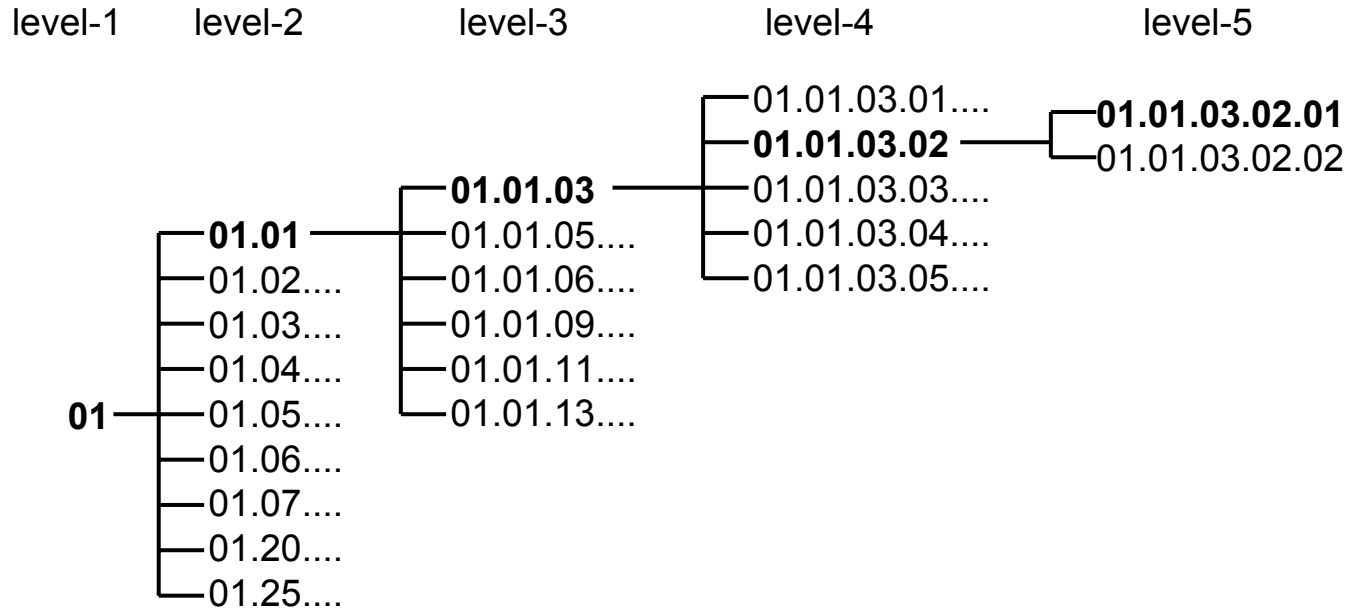

|                |                                                            |
|----------------|------------------------------------------------------------|
| 01             | METABOLISM                                                 |
| 01.01          | amino acid metabolism                                      |
| 01.01.03       | assimilation of ammonia, metabolism of the glutamate group |
| 01.01.03.02    | metabolism of glutamate                                    |
| 01.01.03.02.01 | biosynthesis of glutamate                                  |

Figure S1 Relation of functional categories within a hierarchical annotation scheme. Specific functional categories like 01.01.03.02.01 biosynthesis of glutamate from level-5 of FunCat are part of all increasingly less specific higher-level categories up to general level-1 category 01 METABOLISM.
