# Supplementary material
Source: PubMed Central journal article supplement (PMC524302)
Supplement: nar_32_18_5539__2.pdf [file nar_32_18_5539__2.pdf]

| level 1                                                                        | level 2 | level 3 | level 4 | level 5 | level 6 | total |
|--------------------------------------------------------------------------------|---------|---------|---------|---------|---------|-------|
| 01 METABOLISM                                                                  | 9       | 53      | 85      | 88      | 12      | 248   |
| 02 ENERGY                                                                      | 15      | 30      | 10      | 0       | 0       | 56    |
| 04 STORAGE PROTEIN                                                             | 2       | 0       | 0       | 0       | 0       | 3     |
| 10 CELL CYCLE AND DNA PROCESSING                                               | 2       | 10      | 24      | 10      | 0       | 47    |
| 11 TRANSCRIPTION                                                               | 3       | 9       | 7       | 8       | 0       | 28    |
| 12 PROTEIN SYNTHESIS                                                           | 4       | 4       | 0       | 0       | 0       | 9     |
| 14 PROTEIN FATE (folding, modification, destination)                           | 5       | 10      | 6       | 0       | 0       | 22    |
| 16 PROTEIN WITH BINDING FUNCTION OR COFACTOR REQUIREMENT (structural or cataly | 13      | 22      | 0       | 0       | 0       | 36    |
| 18 PROTEIN ACTIVITY REGULATION                                                 | 2       | 9       | 2       | 6       | 0       | 20    |
| 20 CELLULAR TRANSPORT, TRANSPORT FACILITATION AND TRANSPORT ROUTES             | 3       | 32      | 30      | 9       | 4       | 79    |
| 30 CELLULAR COMMUNICATION/SIGNAL TRANSDUCTION MECHANISM                        | 2       | 6       | 22      | 17      | 0       | 48    |
| 32 CELL RESCUE, DEFENSE AND VIRULENCE                                          | 4       | 22      | 16      | 2       | 0       | 45    |
| 34 INTERACTION WITH THE CELLULAR ENVIRONMENT                                   | 5       | 16      | 15      | 1       | 0       | 38    |
| 36 INTERACTION WITH THE ENVIRONMENT (Systemic)                                 | 7       | 12      | 37      | 20      | 0       | 77    |
| 38 TRANSPOSABLE ELEMENTS, VIRAL AND PLASMID PROTEINS                           | 6       | 0       | 0       | 0       | 0       | 7     |
| 40 CELL FATE                                                                   | 5       | 6       | 11      | 7       | 0       | 30    |
| 41 DEVELOPMENT (Systemic)                                                      | 3       | 24      | 19      | 2       | 0       | 49    |
| 42 BIOGENESIS OF CELLULAR COMPONENTS                                           | 25      | 28      | 0       | 0       | 0       | 54    |
| 43 CELL TYPE DIFFERENTIATION                                                   | 3       | 24      | 29      | 5       | 0       | 62    |
| 45 TISSUE DIFFERENTIATION                                                      | 3       | 15      | 15      | 0       | 0       | 34    |
| 47 ORGAN DIFFERENTIATION                                                       | 3       | 16      | 44      | 14      | 2       | 80    |
| 70 SUBCELLULAR LOCALIZATION                                                    | 25      | 36      | 0       | 0       | 0       | 62    |
| 73 CELL TYPE LOCALIZATION                                                      | 3       | 22      | 24      | 5       | 0       | 55    |
| 75 TISSUE LOCALIZATION                                                         | 3       | 19      | 12      | 0       | 0       | 35    |
| 77 ORGAN LOCALIZATION                                                          | 3       | 16      | 44      | 14      | 2       | 80    |
| 78 ubiquitous expression                                                       | 0       | 0       | 0       | 0       | 0       | 1     |
| 98 CLASSIFICATION NOT YET CLEAR-CUT                                            | 0       | 0       | 0       | 0       | 0       | 1     |
| 99 UNCLASSIFIED PROTEINS                                                       | 0       | 0       | 0       | 0       | 0       | 1     |

1307

Table S1 Number of functional categories in different levels of the main branches of FunCat.  
For the 28 main branches of FunCat the number of functional categories for each hierarchical level are given.
